# Supplementary material for: Novel Associations for Hypothyroidism Include Known Autoimmune Risk Loci
Source: PLoS One. 2012 Apr 6;7(4):e34442. doi: 10.1371/journal.pone.0034442 (PMC3321023; doi:10.1371/journal.pone.0034442)
Supplement: Table S1 — SNPs with -values under . All genomic positions are given with respect to NCBI build 36.3. Alleles are listed as major/minor and are specified for the forward strand. refers to the number of people successfully genotyped for each SNP. Odds ratios are per copy of the minor allele. (XLS) [file pone.0034442.s010.xls]

## Sheet: TableS1.txt
rsid	chrom	location	gene	alleles	MAF	HWE	N	p-value	OR
rs10008892	4	149845207	ATP5LP4 LOC285423	C/A	0.2	0.94	39251	9.6e-05	0.881 (0.83 - 0.94)
rs10089552	8	10325890	MSRA LOC346702	C/T	0.149	0.15	39119	2.8e-05	1.157 (1.08 - 1.24)
rs10096610	8	10327073	MSRA LOC346702	C/T	0.152	0.8	39106	4e-05	1.153 (1.08 - 1.23)
rs10248351	7	88319378	C7orf62 ZNF804B	T/C	0.007	1	39257	6.8e-06	1.843 (1.43 - 2.37)
rs10466829	12	9767358	CLECL1	A/G	0.491	0.24	39253	2.1e-05	1.116 (1.06 - 1.17)
rs10491775	9	14433784	TRNAH-GUG ZDHHC21	A/C	0.116	0.74	39236	7.4e-05	1.167 (1.08 - 1.26)
rs10501511	11	80813903	LOC729790	A/G	0.233	0.26	39254	9.3e-05	0.887 (0.84 - 0.94)
rs1051920	8	81600975	ZBTB10 RPSAP47	C/T	0.254	0.043	39211	3.6e-06	1.143 (1.08 - 1.21)
rs10519980	4	149854475	ATP5LP4 LOC285423	C/T	0.19	0.94	39241	7e-06	0.861 (0.81 - 0.92)
rs10519990	4	149931491	ATP5LP4 LOC285423	A/C	0.192	0.21	39254	3.2e-05	0.871 (0.82 - 0.93)
rs1063355	6	32735692	HLA-DQB1	G/T	0.409	0.32	39246	2.5e-06	0.885 (0.84 - 0.93)
rs1064191	6	31183354	HCG22 C6orf15	C/T	0.462	0.33	39236	2.2e-08	0.868 (0.83 - 0.91)
rs10759944	9	99596793	KRT18P13 FOXE1	G/A	0.332	0.86	39254	5.8e-19	0.782 (0.74 - 0.83)
rs10792563	11	80820326	LOC729790	T/C	0.231	0.28	39112	9.8e-05	0.887 (0.84 - 0.94)
rs10901703	10	128460138	LOC728158 LOC728065	G/A	0.478	0.17	39194	8.5e-05	0.904 (0.86 - 0.95)
rs10916205	1	226024214	SNAP47	C/T	0.4	0.071	39237	8.2e-05	0.902 (0.86 - 0.95)
rs10961534	9	14460833	TRNAH-GUG ZDHHC21	A/G	0.116	0.98	39238	6.6e-06	1.193 (1.11 - 1.29)
rs10984103	9	99679096	FOXE1 C9orf156	C/A	0.366	0.88	39225	3.9e-08	0.864 (0.82 - 0.91)
rs11010324	10	36241443	RPL7P37 NAMPTL	C/T	0.492	0.49	39231	0.0001	1.102 (1.05 - 1.16)
rs11065987	12	110556807	LOC100101246 BRAP	A/G	0.447	0.96	39251	1.7e-10	1.180 (1.12 - 1.24)
rs11066188	12	111095097	C12orf51	G/A	0.441	0.65	39246	4.1e-10	1.176 (1.12 - 1.24)
rs11066320	12	111390798	PTPN11	G/A	0.452	0.46	39250	3.5e-09	1.165 (1.11 - 1.23)
rs11137016	8	623684	ERICH1	A/G	0.251	0.83	39228	9.1e-05	1.122 (1.06 - 1.19)
rs11599718	10	128466059	LOC728158 LOC728065	A/G	0.478	0.33	39253	9e-05	0.905 (0.86 - 0.95)
rs11612407	12	7326517	PEX5 ACSM4	A/C	0.125	0.15	19140	9.5e-05	1.227 (1.11 - 1.36)
rs11764286	7	71453106	RPS28P6 CALN1	T/G	0.079	0.56	21943	2.2e-05	0.753 (0.66 - 0.86)
rs11791821	9	103582843	PPP3R2 LOC100131629	T/C	0.194	0.31	39239	7.5e-05	0.879 (0.82 - 0.94)
rs11898209	2	45872037	PRKCE	A/G	0.162	0.19	39225	2.4e-05	0.860 (0.80 - 0.92)
rs11935941	4	149871928	ATP5LP4 LOC285423	A/C	0.2	0.47	39104	7e-05	0.878 (0.82 - 0.94)
rs11942028	4	149880361	ATP5LP4 LOC285423	T/C	0.201	0.99	39233	4e-05	0.875 (0.82 - 0.93)
rs5756546	22	35919751	C1QTNF6 SSTR3	C/T	0.223	0.0021	39240	8.3e-05	1.126 (1.06 - 1.19)
rs12736858	1	25393677	LOC391020 SYF2	C/T	0.138	0.87	39243	1.2e-05	0.844 (0.78 - 0.91)
rs12895778	14	95131421	GLRX5 TCL6	T/C	0.139	0.77	39245	6.4e-05	0.860 (0.80 - 0.93)
rs1293425	20	51173585	TSHZ2	A/G	0.098	0.85	39249	1.2e-05	0.823 (0.75 - 0.90)
rs1330544	13	109152803	IRS2	C/T	0.219	0.13	39217	7.3e-05	1.131 (1.07 - 1.20)
rs1382879	5	76557624	PDE8B	T/C	0.394	0.027	39100	4.4e-06	1.125 (1.07 - 1.18)
rs1443434	9	99657300	FOXE1	T/G	0.406	0.68	19248	4.6e-05	0.863 (0.80 - 0.93)
rs1472565	1	19627617	LOC100130193 CAPZB	T/C	0.478	0.27	39249	6.3e-05	1.107 (1.05 - 1.16)
rs1477745	12	75737046	ZDHHC17	G/A	0.104	0.77	39232	2.8e-05	1.184 (1.10 - 1.28)
rs1480583	5	105050689	RAB9BP1 LOC345571	C/T	0.399	0.54	39139	3.2e-05	0.897 (0.85 - 0.94)
rs1512261	9	99562351	KRT18P13 FOXE1	T/G	0.379	0.68	39249	2.4e-05	0.892 (0.85 - 0.94)
rs16971699	18	35068580	RPL7AP66	T/C	0.328	0.48	39231	6.1e-05	1.114 (1.06 - 1.17)
rs17019729	1	108047187	VAV3	T/C	0.137	0.56	38110	4.1e-05	1.162 (1.08 - 1.25)
rs17019810	1	108070324	VAV3	C/T	0.091	0.7	19253	2e-06	1.310 (1.17 - 1.46)
rs17019823	1	108071476	VAV3	A/C	0.089	0.1	39096	8e-09	1.274 (1.18 - 1.38)
rs17020055	1	108138056	VAV3	A/C	0.088	0.36	39224	6.5e-09	1.277 (1.18 - 1.39)
rs17020088	1	108153335	VAV3	T/C	0.105	0.76	39250	5.4e-09	1.259 (1.17 - 1.36)
rs17025017	4	149869483	ATP5LP4 LOC285423	G/A	0.198	0.99	39237	2.7e-05	0.872 (0.82 - 0.93)
rs17064407	8	1884581	LOC100131395 ARHGEF10	A/G	0.255	0.00049	39243	7.3e-05	1.121 (1.06 - 1.19)
rs170949	6	4340748	LOC100129052 KU-MEL-3	C/T	0.42	0.022	19253	5.3e-05	1.155 (1.08 - 1.24)
rs17506582	18	6569216	LOC100130480	T/C	0.332	0.98	39211	8e-06	1.128 (1.07 - 1.19)
rs17696736	12	110971201	NAA25	A/G	0.456	0.49	39254	2.8e-10	1.177 (1.12 - 1.24)
rs1877432	9	99583701	KRT18P13 FOXE1	G/A	0.396	0.87	39253	4.4e-09	1.162 (1.11 - 1.22)
rs1941491	18	6593954	LOC100130480 ARHGAP28	C/T	0.443	0.81	39221	1.8e-05	1.118 (1.06 - 1.18)
rs1941496	18	6572104	LOC100130480	G/A	0.071	0.31	39240	8.7e-06	1.236 (1.13 - 1.36)
rs1951462	14	95130498	GLRX5 TCL6	A/G	0.27	0.14	39251	6.7e-05	0.890 (0.84 - 0.94)
rs2046045	5	76571567	PDE8B	T/G	0.398	0.14	39247	4.7e-06	1.124 (1.07 - 1.18)
rs2070600	6	32259421	AGER	C/T	0.041	0.1	39161	3.9e-05	1.275 (1.14 - 1.43)
rs2100181	23	4940267	LOC347381	C/A	0.08	1	19236	4.4e-05	1.234 (1.12 - 1.36)
rs210352	14	53243289	DDHD1 BMP4	G/A	0.425	0.25	39237	3.4e-05	0.898 (0.85 - 0.95)
rs2155835	18	6571793	LOC100130480	G/A	0.34	0.28	38804	8.7e-05	1.113 (1.06 - 1.17)
rs2197402	9	23628686	LOC646609 LOC402360	C/T	0.096	0.00061	37804	1.9e-05	1.179 (1.10 - 1.27)
rs2208663	14	95112629	GLRX5 TCL6	T/G	0.431	0.00061	38876	1.2e-05	0.892 (0.85 - 0.94)
rs2236359	1	226002067	SNAP47	A/G	0.406	0.061	39250	3.7e-05	0.897 (0.85 - 0.94)
rs2391835	13	109988102	RAB20	T/C	0.278	0.19	39234	4.8e-05	0.889 (0.84 - 0.94)
rs2395185	6	32541145	HLA-DRB9 HLA-DRB5	G/T	0.326	0.048	39257	2.8e-06	1.134 (1.08 - 1.20)
rs2476601	1	114179091	PTPN22	G/A	0.092	0.26	39256	3.9e-13	1.356 (1.25 - 1.47)
rs2516049	6	32678378	HLA-DRB1 HLA-DQA1	T/C	0.308	0.19	39241	6e-07	1.146 (1.09 - 1.21)
rs2517448	6	31170646	HCG22 C6orf15	C/T	0.35	0.65	39249	4.8e-06	0.886 (0.84 - 0.93)
rs2517452	6	31168141	HCG22 C6orf15	C/T	0.461	0.31	39241	1.8e-08	0.867 (0.82 - 0.91)
rs2517532	6	31126386	LOC729792 HCG22	G/A	0.403	0.097	39225	1.3e-08	0.864 (0.82 - 0.91)
rs2517552	6	31115569	LOC729792	T/C	0.343	0.46	39239	1.8e-06	0.880 (0.83 - 0.93)
rs2524044	6	31364732	HLA-C HLA-B	T/G	0.169	0.17	39251	7.3e-05	1.142 (1.07 - 1.22)
rs2535311	6	31160663	HCG22 C6orf15	A/G	0.42	0.044	39247	3e-07	1.140 (1.08 - 1.20)
rs2535315	6	31160106	HCG22 C6orf15	C/T	0.42	0.035	39212	2.7e-07	1.141 (1.08 - 1.20)
rs2645492	17	55230336	TMEM49	G/A	0.206	0.87	21634	8.5e-05	1.176 (1.08 - 1.28)
rs2647050	6	32777745	HLA-DQB1 HLA-DQA2	T/C	0.375	0.69	39254	9.1e-05	1.109 (1.05 - 1.17)
rs2706123	2	177738096	RPL29P8 LOC391465	T/C	0.083	0.78	39222	6.6e-05	1.195 (1.10 - 1.30)
rs2744768	1	25929896	MAN1C1	T/G	0.091	0.72	39254	9.9e-05	0.838 (0.77 - 0.92)
rs2844665	6	31114834	LOC729792	C/T	0.354	0.6	39256	5e-07	0.875 (0.83 - 0.92)
rs2856718	6	32778233	HLA-DQB1 HLA-DQA2	C/T	0.375	0.66	39248	8.5e-05	1.110 (1.05 - 1.17)
rs2900784	10	109539457	LOC100128304	C/A	0.349	0.23	39230	8.8e-05	1.109 (1.05 - 1.17)
rs2947117	12	83229438	LOC100128335	A/G	0.446	0.8	39251	7.5e-05	1.106 (1.05 - 1.16)
rs2961674	5	177565133	HNRNPAB	G/A	0.145	0.5	39246	2e-05	1.163 (1.09 - 1.25)
rs2976929	8	8296122	SGK223 CLDN23	T/C	0.496	0.00072	38921	6.3e-05	0.902 (0.86 - 0.95)
rs2976956	8	8279182	SGK223 CLDN23	C/T	0.342	0.68	39222	9.1e-05	1.112 (1.06 - 1.17)
rs2983514	6	165970109	PDE10A	A/G	0.339	0.19	39246	9.2e-05	0.900 (0.85 - 0.95)
rs3104405	6	32790286	HLA-DQB1 HLA-DQA2	A/C	0.315	0.015	38475	6.3e-05	0.894 (0.85 - 0.94)
rs3184504	12	110368991	SH2B3	T/C	0.498	0.43	39245	2.6e-12	0.835 (0.79 - 0.88)
rs3756894	6	117964181	DCBLD1	T/G	0.032	0.42	39253	7.4e-05	1.310 (1.15 - 1.49)
rs3764808	6	31132652	HCG22	T/C	0.232	0.047	19242	1.3e-05	1.191 (1.10 - 1.29)
rs3781834	11	120951150	SORL1	A/G	0.025	0.93	39152	8.7e-05	1.350 (1.17 - 1.56)
rs3806156	6	32481676	BTNL2	G/T	0.361	0.29	39256	4e-05	1.115 (1.06 - 1.17)
rs3817963	6	32476065	BTNL2	T/C	0.289	0.048	39238	8.9e-05	1.115 (1.06 - 1.18)
rs3852412	10	63720294	RTKN2 ZNF365	T/C	0.404	0.0082	39254	9.9e-05	1.105 (1.05 - 1.16)
rs400824	8	81520257	RPS5P5 ZBTB10	C/T	0.321	0.095	39247	2.1e-05	1.122 (1.06 - 1.18)
rs400837	6	167330998	RNASET2 FGFR1OP	C/T	0.476	0.11	39253	1.4e-05	0.895 (0.85 - 0.94)
rs4144518	19	35150325	RPL9P32 C19orf2	T/C	0.047	0.39	39222	7.6e-05	1.264 (1.13 - 1.42)
rs429083	6	167303962	RNASET2 FGFR1OP	C/T	0.476	0.12	39242	1.4e-05	0.894 (0.85 - 0.94)
rs4344419	10	109545419	LOC100128304	T/C	0.35	0.66	39240	7.1e-05	1.111 (1.05 - 1.17)
rs4503375	1	108051805	VAV3	A/G	0.172	0.0042	39253	1.8e-05	1.151 (1.08 - 1.23)
rs4520319	23	23042778	FAM3C2 LOC653707	G/A	0.335	1	39188	7.5e-05	1.098 (1.05 - 1.15)
rs4747583	10	27384703	ANKRD26	T/C	0.061	0.41	39233	6.5e-05	1.233 (1.12 - 1.36)
rs477515	6	32677669	HLA-DRB1 HLA-DQA1	G/A	0.307	0.017	39049	7.7e-07	1.144 (1.09 - 1.21)
rs4804416	19	7174848	INSR	T/G	0.423	0.32	39238	5.3e-06	1.125 (1.07 - 1.18)
rs4841578	8	11553782	BLK GATA4	A/G	0.255	1e-12	38965	2.3e-05	0.883 (0.83 - 0.94)
rs4883177	12	7303618	PEX5 ACSM4	C/T	0.119	0.51	39251	2.4e-05	1.178 (1.09 - 1.27)
rs4915076	1	108161028	VAV3	T/C	0.084	0.9	39253	8e-10	1.302 (1.20 - 1.41)
rs4915077	1	108167539	VAV3	T/C	0.084	0.9	39248	7.5e-10	1.302 (1.20 - 1.41)
rs4953260	2	45887223	PRKCE	C/T	0.234	0.88	39252	8.6e-05	0.887 (0.83 - 0.94)
rs550408	20	882948	ANGPT4 RSPO4	C/T	0.39	0.032	39235	4.7e-05	0.898 (0.85 - 0.95)
rs6457327	6	31182009	HCG22 C6orf15	C/A	0.351	0.71	39254	4.2e-06	0.885 (0.84 - 0.93)
rs653178	12	110492139	ATXN2	C/T	0.496	0.71	39256	5e-12	0.837 (0.80 - 0.88)
rs6535627	4	149853163	ATP5LP4 LOC285423	T/G	0.198	0.89	39235	2e-05	0.870 (0.82 - 0.93)
rs3742539	14	51449937	GNG2	G/A	0.121	0.23	39244	3.6e-05	1.175 (1.09 - 1.27)
rs6583042	1	108047769	VAV3	G/A	0.172	0.054	39101	5.6e-06	1.160 (1.09 - 1.24)
rs6602026	10	3152423	PFKP	A/G	0.158	0.36	39247	1.7e-05	1.161 (1.09 - 1.24)
rs6674340	1	108075154	VAV3	A/G	0.186	0.0027	39217	5e-05	1.138 (1.07 - 1.21)
rs6848368	4	149916536	ATP5LP4 LOC285423	A/C	0.189	0.64	39231	3.2e-05	0.870 (0.81 - 0.93)
rs6851340	4	6435724	PPP2R2C	C/T	0.188	0.73	36520	1.8e-05	1.148 (1.08 - 1.22)
rs6905949	6	30248504	TRIM15 TRIM26	T/C	0.191	0.45	39253	6.3e-05	0.874 (0.82 - 0.93)
rs6961188	7	104383991	RN7SL8P LOC100131929	T/C	0.173	0.1	39211	5.6e-05	1.139 (1.07 - 1.21)
rs6964680	7	147607972	LOC392145	T/G	0.113	0.92	39248	4.4e-05	0.845 (0.78 - 0.92)
rs7005230	8	10340797	MSRA LOC346702	C/A	0.145	0.57	39190	5.7e-05	1.152 (1.08 - 1.23)
rs7011400	8	8211914	FLJ10661 SGK223	C/T	0.244	0.0078	39238	7.2e-05	0.888 (0.84 - 0.94)
rs7024345	9	99635059	KRT18P13 FOXE1	G/A	0.261	0.2	38890	1e-08	0.843 (0.80 - 0.89)
rs706779	10	6138830	IL2RA	T/C	0.486	0.4	39241	7.2e-05	0.903 (0.86 - 0.95)
rs7090530	10	6150881	IL2RA RBM17	A/C	0.419	0.28	39252	5.8e-05	0.901 (0.86 - 0.95)
rs7437928	4	149794238	ASS1P8 ATP5LP4	C/T	0.476	0.37	39252	5.6e-05	0.902 (0.86 - 0.95)
rs748860	2	23608453	KLHL29	T/C	0.407	0.064	39242	7.4e-05	0.902 (0.86 - 0.95)
rs7508679	19	7173832	INSR	C/T	0.423	0.38	39236	4.7e-05	0.899 (0.85 - 0.95)
rs7649378	3	3066331	CNTN4	A/C	0.33	0.15	39237	8.9e-05	1.112 (1.05 - 1.17)
rs7830160	8	81544426	RPS5P5 ZBTB10	C/T	0.261	0.036	39250	2.3e-05	1.129 (1.07 - 1.19)
rs7850258	9	99588834	KRT18P13 FOXE1	G/A	0.332	0.91	39249	2.5e-19	0.780 (0.74 - 0.82)
rs7866436	9	99689917	FOXE1 C9orf156	A/G	0.37	0.81	39252	2.4e-08	0.862 (0.82 - 0.91)
rs7908795	10	109538698	LOC100128304	G/A	0.345	0.64	39244	9.4e-05	1.110 (1.05 - 1.17)
rs7935421	11	132377262	LOC100128095 OPCML	T/C	0.402	0.99	39235	7.9e-05	0.902 (0.86 - 0.95)
rs8066838	17	15229158	TEKT3 CDRT4	C/A	0.416	0.031	39243	6.9e-05	0.903 (0.86 - 0.95)
rs8102597	19	6342219	GTF2F1	A/G	0.076	0.67	39255	4.8e-05	0.816 (0.74 - 0.90)
rs832790	5	76604048	PDE8B	C/A	0.401	0.74	39139	3.9e-05	1.110 (1.06 - 1.17)
rs907580	9	99662418	FOXE1 C9orf156	C/T	0.261	0.1	39256	1.2e-08	0.844 (0.80 - 0.89)
rs925487	9	99676219	FOXE1 C9orf156	T/C	0.365	0.92	39233	4.1e-08	0.864 (0.82 - 0.91)
rs9262638	6	31133968	HCG22	C/T	0.233	0.00011	39238	2.4e-07	1.161 (1.10 - 1.23)
rs9262639	6	31133988	HCG22	C/T	0.232	0.012	39254	2.1e-07	1.163 (1.10 - 1.23)
rs9264904	6	31380532	HLA-C HLA-B	G/A	0.283	0.2	39240	1.5e-06	1.142 (1.08 - 1.21)
rs9266689	6	31456559	DHFRP2 HCP5	G/A	0.344	0.97	39246	1.5e-06	0.880 (0.83 - 0.93)
rs9275141	6	32759095	HLA-DQB1 HLA-DQA2	G/T	0.493	0.63	39239	4.7e-06	0.890 (0.85 - 0.94)
rs9275596	6	32789609	HLA-DQB1 HLA-DQA2	T/C	0.349	0.37	39244	6.4e-05	0.899 (0.85 - 0.95)
rs9303674	17	29482962	LOC100131744 CCL2	C/T	0.107	0.66	39249	8e-06	0.829 (0.76 - 0.90)
rs9366415	6	21971878	SOX4 LOC729177	C/T	0.339	0.13	39250	6.9e-05	0.898 (0.85 - 0.95)
rs9275563	6	32785890	HLA-DQB1 HLA-DQA2	C/T	0.478	0.073	38924	2.3e-06	1.129 (1.07 - 1.19)
rs948426	18	6557182	LOC100130480	A/G	0.398	0.28	39254	1.4e-06	0.880 (0.84 - 0.93)
rs9521823	13	109987857	RAB20	A/G	0.279	0.21	39248	3.7e-05	0.888 (0.84 - 0.94)
rs960615	2	151441447	RND3 FABP5P10	C/T	0.201	0.18	39207	3.2e-05	0.875 (0.82 - 0.93)
rs964254	14	53237867	DDHD1 BMP4	G/A	0.474	0.77	39236	9.1e-05	1.103 (1.05 - 1.16)
rs9647530	5	55420666	IL6ST ANKRD55	C/T	0.478	0.064	39249	5.7e-05	0.902 (0.86 - 0.95)
rs965513	9	99595930	KRT18P13 FOXE1	G/A	0.333	0.8	39255	4.3e-19	0.781 (0.74 - 0.83)
rs965912	11	1900778	TNNT3	G/A	0.192	0.63	39213	8.5e-05	1.132 (1.06 - 1.20)
rs9792648	9	103416422	PPP3R2 GRIN3A	A/G	0.063	0.73	39250	2.7e-05	0.799 (0.72 - 0.89)
rs989758	5	76580716	PDE8B	G/A	0.36	0.61	39184	1.9e-05	1.118 (1.06 - 1.18)
rs9901756	17	29488267	LOC100131744 CCL2	A/C	0.107	0.49	39219	7e-06	0.828 (0.76 - 0.90)
rs1002365	1	19669835	LOC100130193 CAPZB	C/T	0.448	0.78	39211	9.9e-05	1.105 (1.05 - 1.16)
rs3130977	6	31189968	C6orf15 PSORS1C1	T/C	0.324	3.9e-05	39248	4.8e-05	1.114 (1.06 - 1.17)
rs8092631	18	6577541	LOC100130480	C/T	0.409	0.51	39227	2.3e-05	0.895 (0.85 - 0.94)
rs974966	2	36902026	VIT STRN	A/G	0.374	0.013	37415	2e-05	1.121 (1.06 - 1.18)
rs1612904	6	32776996	HLA-DQB1 HLA-DQA2	A/C	0.349	0.15	38850	7.3e-05	0.899 (0.85 - 0.95)
rs2249876	6	31156366	HCG22 C6orf15	G/A	0.425	0.047	39199	4.3e-07	1.138 (1.08 - 1.20)
rs2256583	6	31366825	HLA-C HLA-B	T/C	0.169	0.15	39254	7.7e-05	1.141 (1.07 - 1.22)
rs231775	2	204440959	CTLA4	A/G	0.368	0.85	39253	9.4e-06	1.123 (1.07 - 1.18)
rs231779	2	204442732	CTLA4	C/T	0.365	0.84	39254	7e-06	1.126 (1.07 - 1.19)
rs2535293	6	31170342	HCG22 C6orf15	G/A	0.46	0.78	39129	3.8e-08	0.870 (0.83 - 0.91)
rs2535294	6	31170112	HCG22 C6orf15	G/A	0.474	0.26	39250	1.7e-08	0.868 (0.83 - 0.91)
rs3087243	2	204447164	CTLA4 ICOS	G/A	0.454	0.32	39256	6.8e-05	0.903 (0.86 - 0.95)
rs3134975	6	32760559	HLA-DQB1 HLA-DQA2	C/T	0.244	0.058	37032	8.8e-07	0.860 (0.81 - 0.91)
rs3135006	6	32775097	HLA-DQB1 HLA-DQA2	C/T	0.236	0.38	39082	9.6e-07	0.863 (0.81 - 0.92)
rs6916742	6	32561169	HLA-DRB9 HLA-DRB5	C/T	0.472	7.3e-299	35963	1.6e-05	0.880 (0.83 - 0.93)
rs6927022	6	32720375	HLA-DQA1 HLA-DQB1	A/G	0.454	2.7e-09	35678	6.1e-06	1.128 (1.07 - 1.19)
rs6928482	6	32734227	HLA-DQA1 HLA-DQB1	T/C	0.483	1.3e-05	37998	3.4e-05	1.113 (1.06 - 1.17)
rs7248104	19	7175431	INSR	G/A	0.419	0.28	39249	6.6e-05	0.901 (0.86 - 0.95)
rs9266271	6	31434061	HLA-B DHFRP2	T/C	0.49	1.6e-06	14862	1.7e-06	1.216 (1.12 - 1.32)
rs9272346	6	32712350	HLA-DRB1 HLA-DQA1	A/G	0.402	1.4e-41	37083	2e-06	0.883 (0.84 - 0.93)
rs9272723	6	32717405	HLA-DQA1	C/T	0.395	5.3e-29	20501	9.1e-05	0.865 (0.81 - 0.93)
rs1939995	11	126356059	KIRREL3	G/C	0.125	0.57	38955	7.3e-05	0.855 (0.79 - 0.93)
rs3129720	6	32771609	HLA-DQB1 HLA-DQA2	C/T	0.236	0.18	38822	5.3e-07	0.859 (0.81 - 0.91)
rs4698307	4	14587533	LOC152742 LOC441009	G/A	0.019	0.12	38952	4.8e-05	1.439 (1.22 - 1.70)
rs7848973	9	99628660	KRT18P13 FOXE1	G/A	0.399	0.91	38946	7.1e-11	0.842 (0.80 - 0.89)
rs888053	2	36903067	VIT STRN	A/T	0.419	0.67	38945	6e-05	1.109 (1.05 - 1.17)
rs925489	9	99586421	KRT18P13 FOXE1	T/C	0.332	0.74	38947	2.4e-19	0.779 (0.74 - 0.82)
rs9521826	13	109991960	RAB20	A/G	0.275	0.24	38949	2.1e-05	0.884 (0.83 - 0.94)
rs6679677	1	114105331	PHTF1 RSBN1	C/A	0.091	0.34	38959	2.8e-13	1.361 (1.25 - 1.48)
i4990088	6	32722679	HLA-DQA1 HLA-DQB1	A/T	0.306	0.00097	38657	6.7e-06	1.131 (1.07 - 1.19)
rs229526	22	35911368	C1QTNF6	G/C	0.221	0.041	21619	8.8e-06	1.216 (1.12 - 1.32)
rs277079	19	35257896	TAF9P3 ZNF536	A/G	0.046	0.73	21626	5.8e-05	1.398 (1.20 - 1.62)
rs419558	4	108063541	DKK2	C/T	0.262	0.37	21624	8.4e-05	1.159 (1.07 - 1.25)
rs450533	4	108049710	AIMP1 DKK2	T/C	0.345	0.34	21625	1.6e-05	1.165 (1.08 - 1.25)
rs459362	3	236442	CHL1	A/G	0.086	0.00014	21328	7.4e-05	1.256 (1.12 - 1.41)
rs655167	1	186169604	LOC100129274	G/A	0.124	0.016	21602	6.8e-06	1.259 (1.14 - 1.39)
rs1046795	9	98695179	LOC100132781 LOC441454	C/T	0.005	1	21603	4.3e-05	0.267 (0.12 - 0.58)
rs1265054	6	31187622	C6orf15	C/T	0.46	0.78	21625	3e-06	0.850 (0.79 - 0.91)
rs1265063	6	31185917	HCG22 C6orf15	G/A	0.46	0.74	21607	3.1e-06	0.851 (0.79 - 0.91)
rs1443438	9	99589849	KRT18P13 FOXE1	C/T	0.33	0.82	21619	5.5e-11	0.773 (0.72 - 0.83)
rs1535213	20	14470894	FLRT3 MACROD2	A/G	0.183	0.37	21620	9.8e-05	0.840 (0.77 - 0.92)
rs1561710	15	69558639	RPL17P39 THSD4	G/A	0.207	0.22	21621	5e-05	0.840 (0.77 - 0.92)
rs1885281	10	114482888	VTI1A	A/G	0.062	0.4	21616	5.6e-05	1.339 (1.17 - 1.53)
rs1894411	6	32900951	TAP2	T/C	0.116	0.45	21472	9.5e-05	1.224 (1.10 - 1.36)
rs2106067	6	31156242	HCG22 C6orf15	T/C	0.422	0.76	21602	6.2e-06	1.169 (1.09 - 1.25)
rs2233966	6	31188838	C6orf15 PSORS1C1	G/A	0.484	0.97	21616	3.5e-05	0.867 (0.81 - 0.93)
rs2249231	6	31151211	HCG22 C6orf15	G/A	0.426	0.33	21083	1e-05	1.166 (1.09 - 1.25)
rs2256436	6	31139360	HCG22 C6orf15	A/G	0.422	0.89	21621	9.1e-06	1.166 (1.09 - 1.25)
rs2291297	1	38045247	YRDC	G/A	0.291	0.93	21623	6.9e-05	0.856 (0.79 - 0.92)
rs2517453	6	31168094	HCG22 C6orf15	T/C	0.46	0.84	21620	2.3e-06	0.849 (0.79 - 0.91)
rs2517471	6	31160077	HCG22 C6orf15	C/G	0.427	0.92	21607	1.2e-05	1.164 (1.09 - 1.25)
rs2517477	6	31152842	HCG22 C6orf15	G/A	0.422	0.76	21619	7.5e-06	1.168 (1.09 - 1.25)
rs2517478	6	31152781	HCG22 C6orf15	G/T	0.422	0.8	21628	8.3e-06	1.167 (1.09 - 1.25)
rs2517484	6	31182108	HCG22 C6orf15	G/A	0.397	4.3e-47	21464	5.6e-05	1.145 (1.07 - 1.22)
rs2517489	6	31150285	HCG22 C6orf15	G/A	0.422	0.89	21626	6.8e-06	1.169 (1.09 - 1.25)
rs2517497	6	31144762	HCG22 C6orf15	A/G	0.427	0.98	21628	8.2e-06	1.167 (1.09 - 1.25)
rs2517500	6	31141488	HCG22 C6orf15	C/T	0.422	0.89	21614	7.3e-06	1.168 (1.09 - 1.25)
rs2517502	6	31140916	HCG22 C6orf15	C/T	0.422	0.89	21614	8e-06	1.167 (1.09 - 1.25)
rs2517504	6	31140349	HCG22 C6orf15	T/G	0.427	0.98	21627	8.1e-06	1.167 (1.09 - 1.25)
rs2517510	6	31138101	HCG22 C6orf15	T/G	0.427	0.98	21628	8.2e-06	1.167 (1.09 - 1.25)
rs2517511	6	31137897	HCG22 C6orf15	A/C	0.427	0.98	21602	6.9e-06	1.169 (1.09 - 1.25)
rs2517516	6	31136899	HCG22 C6orf15	T/C	0.427	0.64	21515	8.5e-06	1.167 (1.09 - 1.25)
rs2517523	6	31134413	HCG22	A/G	0.427	0.97	21622	7.4e-06	1.168 (1.09 - 1.25)
rs2517527	6	31129526	LOC729792 HCG22	G/A	0.354	0.88	21625	9.5e-06	0.847 (0.79 - 0.91)
rs2517534	6	31125313	LOC729792 HCG22	G/A	0.401	0.9	21590	1.7e-06	0.842 (0.79 - 0.90)
rs2523836	6	31155124	HCG22 C6orf15	C/T	0.422	0.8	21628	8.3e-06	1.167 (1.09 - 1.25)
rs2523843	6	31154507	HCG22 C6orf15	A/G	0.422	0.8	21627	7.6e-06	1.168 (1.09 - 1.25)
rs2523881	6	31150587	HCG22 C6orf15	T/G	0.422	0.91	21619	6.9e-06	1.168 (1.09 - 1.25)
rs2523884	6	31149134	HCG22 C6orf15	C/T	0.422	0.88	21620	6.5e-06	1.169 (1.09 - 1.25)
rs2523891	6	31146955	HCG22 C6orf15	C/T	0.422	0.85	21607	9.5e-06	1.166 (1.09 - 1.25)
rs2523895	6	31155450	HCG22 C6orf15	A/C	0.427	0.89	21594	1.3e-05	1.164 (1.09 - 1.25)
rs2535283	6	31176399	HCG22 C6orf15	G/A	0.457	0.52	21379	2.9e-06	0.849 (0.79 - 0.91)
rs2535289	6	31171212	HCG22 C6orf15	A/G	0.472	3.1e-05	21612	4.5e-06	0.855 (0.80 - 0.91)
rs2535291	6	31170878	HCG22 C6orf15	A/G	0.461	0.83	21536	3.7e-06	0.852 (0.79 - 0.91)
rs2535303	6	31163402	HCG22 C6orf15	A/G	0.46	0.9	21621	2.2e-06	0.849 (0.79 - 0.91)
rs2535304	6	31162666	HCG22 C6orf15	T/C	0.428	0.86	21609	1.4e-05	1.163 (1.08 - 1.25)
rs2535306	6	31161846	HCG22 C6orf15	A/G	0.422	0.7	21566	8.8e-06	1.166 (1.09 - 1.25)
rs2535310	6	31161236	HCG22 C6orf15	C/A	0.468	1	21613	2.7e-06	0.850 (0.79 - 0.91)
rs2535318	6	31159367	HCG22 C6orf15	C/T	0.427	0.92	21628	1e-05	1.166 (1.09 - 1.25)
rs2905759	6	31152447	HCG22 C6orf15	C/T	0.422	0.89	21623	8.8e-06	1.166 (1.09 - 1.25)
rs2913752	5	177569177	AGXT2L2 HNRNPAB	C/T	0.147	0.45	21625	1.6e-05	1.231 (1.12 - 1.35)
rs3017313	11	56662553	OR5BP1P LRRC55	T/C	0.114	0.63	21603	8.8e-05	0.796 (0.71 - 0.89)
rs3130553	6	31190264	C6orf15 PSORS1C1	G/A	0.499	0.31	21594	7.3e-05	0.872 (0.81 - 0.93)
rs3131927	6	31120975	LOC729792	C/T	0.354	5.1e-09	21583	6.1e-05	0.865 (0.81 - 0.93)
rs3134996	6	32744844	HLA-DQB1 HLA-DQA2	T/A	0.354	0.76	21625	8.4e-06	0.848 (0.79 - 0.91)
rs3748682	1	38052574	MTF1	T/C	0.251	2.9e-40	21551	8.6e-06	0.841 (0.78 - 0.91)
rs4704397	5	76554198	PDE8B	G/A	0.391	0.85	21622	2.1e-06	1.174 (1.10 - 1.26)
rs4937788	11	132881278	LOC100128095 LOC646522	C/T	0.106	0.75	21623	8.5e-05	1.231 (1.11 - 1.37)
rs6885099	5	76566105	PDE8B	A/G	0.401	0.79	21622	3.1e-06	1.170 (1.09 - 1.25)
rs6941772	6	31156895	HCG22 C6orf15	C/G	0.427	0.83	21605	1e-05	1.166 (1.09 - 1.25)
rs7040493	9	98660098	LOC100132781	A/G	0.005	1	21620	4.6e-05	0.268 (0.12 - 0.58)
rs7057398	23	106031185	RIPPLY1	T/C	0.268	1	21619	7.2e-05	0.871 (0.81 - 0.93)
rs7094671	10	95345607	RBP4	G/A	0.258	0.22	21628	5.8e-05	1.167 (1.08 - 1.26)
rs7154112	14	58784070	DAAM1	T/C	0.253	0.15	21344	8.2e-05	1.172 (1.08 - 1.27)
rs7219021	17	44195540	TTLL6	T/G	0.259	0.38	21580	6.2e-05	0.860 (0.79 - 0.93)
rs7381897	6	31181882	HCG22 C6orf15	G/A	0.46	0.74	21627	3.5e-06	0.851 (0.79 - 0.91)
rs7723858	5	40322619	LOC285634 PTGER4	C/A	0.135	0.3	21623	3.5e-05	1.226 (1.11 - 1.35)
rs7870795	9	99613941	KRT18P13 FOXE1	C/T	0.304	0.55	21580	3e-05	0.842 (0.78 - 0.91)
rs7907790	10	55573114	PCDH15	T/C	0.481	0.13	21518	3e-05	0.869 (0.81 - 0.93)
rs8002276	13	102324140	ERCC5	T/C	0.185	0.46	21624	9.5e-05	0.842 (0.77 - 0.92)
rs8026315	15	59356808	CYCSP38 VPS13C	G/T	0.295	0.44	21622	7.9e-05	0.861 (0.80 - 0.93)
rs9263473	6	31158158	HCG22 C6orf15	A/G	0.427	0.91	21574	9.5e-06	1.166 (1.09 - 1.25)
rs9263474	6	31158223	HCG22 C6orf15	A/C	0.427	0.89	21620	9.2e-06	1.166 (1.09 - 1.25)
rs9273349	6	32733847	HLA-DQA1 HLA-DQB1	C/T	0.413	0.77	21625	8.4e-05	0.868 (0.81 - 0.93)
rs9422352	10	48227829	GDF10 PTPN20B	T/C	0.166	0.92	21612	5.8e-05	1.199 (1.10 - 1.31)
rs9514069	13	102354062	LOC121952 SLC10A2	G/A	0.458	0.58	21626	4.8e-05	0.872 (0.81 - 0.93)
rs9589219	13	90861956	GPC5	T/C	0.027	0.66	21621	8.7e-05	0.610 (0.47 - 0.79)
rs9899580	17	44461877	IGF2BP1	T/G	0.327	0.14	21618	7.5e-05	0.867 (0.80 - 0.93)
rs9899611	17	55186972	TMEM49	A/G	0.208	0.55	21616	5.9e-05	1.180 (1.09 - 1.28)
rs9968167	3	2204166	CNTN4	C/T	0	1	21624	8.6e-05	33.593 (5.49 - 205.53)
rs10037599	5	76577081	PDE8B	A/C	0.399	0.74	21577	1.1e-05	1.160 (1.08 - 1.24)
rs10162002	13	22940510	SACS TNFRSF19	G/A	0.149	0.037	21573	5.1e-06	1.233 (1.13 - 1.35)
rs10271244	7	44109866	POLM AEBP1	A/G	0.264	0.0093	21518	2e-05	0.845 (0.78 - 0.91)
rs10759960	9	99648566	KRT18P13 FOXE1	G/A	0.302	0.61	21624	5.6e-05	0.846 (0.78 - 0.91)
rs10816284	9	107419825	FKTN	G/A	0.41	0.25	21598	4.9e-05	1.153 (1.08 - 1.24)
rs11248998	1	25401949	LOC391020 SYF2	C/T	0.003	1	21621	5.6e-05	0.077 (0.01 - 0.56)
rs11655950	17	44484120	IGF2BP1	G/A	0.327	0.13	21627	8.4e-05	0.868 (0.81 - 0.93)
rs12109210	5	178838091	ADAMTS2 LOC100128622	A/G	0.001	1	21628	8.9e-05	8.026 (3.23 - 19.92)
rs12460600	19	35228990	TAF9P3 ZNF536	A/G	0.048	0.5	21479	3.7e-05	1.392 (1.20 - 1.61)
rs12728438	1	38121987	INPP5B	G/A	0.291	0.61	21626	6e-05	0.855 (0.79 - 0.92)
rs12742756	1	38120004	INPP5B	A/G	0.445	0.96	21623	1.5e-05	0.857 (0.80 - 0.92)
rs12751325	1	38061970	MTF1	T/C	0.294	0.79	21622	8.4e-05	0.858 (0.79 - 0.93)
rs13314351	3	70500683	LOC100128160 FOXP1	C/T	0.353	0.076	21513	1.6e-05	1.168 (1.09 - 1.25)
rs16955642	15	69541279	RPL17P39 THSD4	T/G	0.231	0.37	21605	9.5e-05	0.850 (0.78 - 0.92)
rs16955676	15	69549438	RPL17P39 THSD4	T/G	0.203	0.085	21617	3e-05	0.835 (0.76 - 0.91)
