# Supplementary material for: Novel Associations for Hypothyroidism Include Known Autoimmune Risk Loci
Source: PLoS One. 2012 Apr 6;7(4):e34442. doi: 10.1371/journal.pone.0034442 (PMC3321023; doi:10.1371/journal.pone.0034442)
Supplement: Table S2 — SNPs identified in other autoimmune diseases. The 107 SNPs studied across 7 autoimmune diseases in Cotsapas et al., 2011. Under a threshold of for significance, only PTPN22, SH2B3, and CTLA4 are significant. See Table S1 for details on columns. (XLS) [file pone.0034442.s011.xls]

## Sheet: TableS2.txt
rsid	chrom	location	gene	alleles	MAF	HWE	N	p-value	OR
rs6426833	1	20044447	RNF186 OTUD3	A/G	0.455	0.44	39256	0.093	0.957 (0.91 - 1.01)
rs2201841	1	67466790	IL23R	A/G	0.313	0.61	39253	0.99	1.000 (0.95 - 1.06)
rs11465804	1	67475114	IL23R	T/G	0.066	0.7	39248	0.4	0.956 (0.86 - 1.06)
rs10889677	1	67497708	IL23R	C/A	0.314	0.36	39254	0.95	0.998 (0.95 - 1.05)
rs11209032	1	67512680	IL23R LOC100130497	G/A	0.328	0.58	39257	0.7	0.990 (0.94 - 1.04)
rs2476601	1	114179091	PTPN22	G/A	0.092	0.26	39256	3.9e-13	1.356 (1.25 - 1.47)
rs2274910	1	159118670	ITLN1	C/T	0.319	0.37	39251	0.3	0.973 (0.92 - 1.03)
rs9286879	1	171128857	LOC441915 TNFSF18	A/G	0.245	0.59	39257	0.099	0.952 (0.90 - 1.01)
rs1234315	1	171445086	TNFSF4 RPL26P11	C/T	0.47	0.46	39256	0.67	1.011 (0.96 - 1.06)
rs2816316	1	190803436	RGS21 RGS1	A/C	0.178	0.84	39252	0.6	0.984 (0.92 - 1.05)
rs11584383	1	199202489	C1orf81 KIF21B	T/C	0.287	0.21	38959	0.82	1.007 (0.95 - 1.06)
rs3024505	1	205006527	MAPKAPK2 IL10	G/A	0.153	0.16	39223	0.28	1.039 (0.97 - 1.11)
rs917997	2	102437000	IL18RAP SLC9A4	C/T	0.235	0.021	39257	0.96	1.002 (0.94 - 1.06)
rs1990760	2	162832297	IFIH1	T/C	0.412	0.8	39257	0.75	0.991 (0.94 - 1.04)
rs1344706	2	185486673	ZNF804A	A/C	0.38	0.23	21628	0.87	0.991 (0.92 - 1.06)
rs3821236	2	191611003	STAT4	G/A	0.199	0.59	39246	0.22	1.039 (0.98 - 1.11)
rs3087243	2	204447164	CTLA4 ICOS	G/A	0.454	0.32	39256	6.8e-05	0.903 (0.86 - 0.95)
rs3828309	2	233845149	ATG16L1	G/A	0.468	0.0027	21625	0.73	0.991 (0.93 - 1.06)
rs6441961	3	46327388	LOC100131327	C/T	0.31	0.9	39253	0.79	1.007 (0.95 - 1.06)
rs3197999	3	49696536	MST1	G/A	0.306	0.046	39244	0.57	0.984 (0.93 - 1.04)
rs6445975	3	58345217	PXK	T/G	0.281	0.15	39255	0.31	1.031 (0.98 - 1.09)
rs10517086	4	25694609	C4orf52 LOC645481	G/A	0.297	0.66	39250	0.88	0.997 (0.94 - 1.05)
rs4505848	4	123351942	KIAA1109	A/G	0.33	0.52	39230	0.67	1.013 (0.96 - 1.07)
rs6822844	4	123728871	IL2 IL21	G/T	0.151	0.61	39257	0.32	0.966 (0.90 - 1.04)
rs6897932	5	35910332	IL7R	C/T	0.26	0.00071	39257	0.0058	0.924 (0.87 - 0.98)
rs4613763	5	40428485	LOC285634 PTGER4	T/C	0.126	0.5	39257	0.21	0.954 (0.88 - 1.03)
rs30187	5	96150086	ERAP1	C/T	0.357	0.61	39257	0.3	1.027 (0.98 - 1.08)
rs2188962	5	131798704	C5orf56	C/T	0.417	0.0018	39255	0.15	1.036 (0.99 - 1.09)
rs20541	5	132023863	IL13	G/A	0.199	1	39239	0.85	1.006 (0.94 - 1.07)
rs11747270	5	150239060	IRGM ZNF300	A/G	0.093	0.39	38959	0.013	0.893 (0.82 - 0.98)
rs17728338	5	150458511	TNIP1 ANXA6	G/A	0.061	0.32	21628	0.69	0.965 (0.83 - 1.12)
rs2082412	5	158650367	UBLCP1 IL12B	G/A	0.205	0.52	21608	0.36	0.963 (0.88 - 1.05)
rs7709212	5	158696755	IL12B ADRA1B	T/C	0.333	0.56	39246	0.87	0.994 (0.94 - 1.05)
rs10045431	5	158747111	IL12B ADRA1B	C/A	0.295	0.23	39257	0.16	1.041 (0.99 - 1.10)
rs6908425	6	20836710	CDKAL1	C/T	0.214	0.87	39257	0.33	0.970 (0.91 - 1.03)
rs11755527	6	91014952	BACH2	C/G	0.443	0.093	21628	0.28	0.957 (0.89 - 1.03)
rs7746082	6	106541962	LOC100130683 PRDM1	G/C	0.292	0.65	21628	0.12	1.062 (0.99 - 1.14)
rs548234	6	106674727	PRDM1 ATG5	T/C	0.321	0.18	39247	0.62	1.013 (0.96 - 1.07)
rs6568431	6	106695499	PRDM1 ATG5	C/A	0.384	0.95	39251	0.54	1.016 (0.97 - 1.07)
rs9388489	6	126740412	CENPW MIR588	A/G	0.479	0.84	39256	0.66	0.990 (0.94 - 1.04)
rs610604	6	138241110	TNFAIP3	T/G	0.328	0.033	39257	0.88	1.006 (0.95 - 1.06)
rs2301436	6	167357978	FGFR1OP	C/T	0.47	0.77	39257	0.00053	1.093 (1.04 - 1.15)
rs7804356	7	26858190	SKAP2	T/C	0.24	0.42	39256	0.7	1.012 (0.95 - 1.07)
rs849142	7	28152416	JAZF1	C/T	0.498	0.7	21609	0.46	0.974 (0.91 - 1.04)
rs1456893	7	50240218	C7orf72 IKZF1	A/G	0.304	0.49	39255	0.0085	1.076 (1.02 - 1.14)
rs4917014	7	50276409	C7orf72 IKZF1	T/G	0.324	0.49	39151	0.41	0.977 (0.93 - 1.03)
rs4948088	7	50994688	GRB10 COBL	C/A	0.039	0.66	21628	0.51	0.949 (0.79 - 1.14)
rs1167796	7	75011116	HIP1	G/A	0.427	0.87	39211	0.15	1.039 (0.99 - 1.09)
rs886774	7	107282670	LOC100128307 DLD	A/G	0.396	0.98	21588	0.5	1.026 (0.96 - 1.10)
rs4728142	7	128361203	LOC392787 IRF5	G/A	0.446	0.48	39252	0.5	1.018 (0.97 - 1.07)
rs7020673	9	4281747	C9orf70 GLIS3	G/C	0.482	0.02	21607	0.34	0.965 (0.90 - 1.03)
rs10758669	9	4971602	LOC100128701	A/C	0.349	0.95	39252	0.87	1.004 (0.95 - 1.06)
rs4263839	9	116606261	TNFSF15	G/A	0.312	0.34	38958	0.65	0.987 (0.94 - 1.04)
rs2104286	10	6139051	IL2RA	T/C	0.257	0.13	38959	0.3	0.970 (0.92 - 1.03)
rs12251307	10	6163501	IL2RA RBM17	C/T	0.119	0.0055	39257	0.027	0.916 (0.85 - 0.99)
rs947474	10	6430456	LOC399715 DKFZp667F0711	A/G	0.19	0.049	22193	0.016	0.892 (0.82 - 0.97)
rs11258747	10	6512897	PRKCQ	G/T	0.21	0.32	21608	0.73	1.021 (0.94 - 1.11)
rs17582416	10	35327656	LOC646218 CUL2	T/G	0.352	0.81	21628	0.99	0.993 (0.92 - 1.07)
rs1913517	10	49789060	LRRC18 WDFY4	A/G	0.489	0.21	39250	0.28	0.974 (0.93 - 1.02)
rs10995271	10	64108492	ZNF365 ALDH7A1P4	G/C	0.392	0.95	38959	0.16	0.962 (0.91 - 1.01)
rs10509540	10	90013013	LOC100128990 RNLS	T/C	0.261	0.42	678	0.036	0.616 (0.39 - 0.98)
rs11190140	10	101281583	GOT1 NKX2-3	C/T	0.488	0.59	39257	0.011	1.067 (1.02 - 1.12)
rs4963128	11	579564	PHRF1	C/T	0.337	0.68	39245	0.007	0.930 (0.88 - 0.98)
rs7111341	11	2169742	TH ASCL2	C/T	0.269	0.95	39256	0.7	1.011 (0.96 - 1.07)
rs7927894	11	75978964	C11orf30 LRRC32	C/T	0.391	0.85	38959	0.52	1.017 (0.97 - 1.07)
rs6590330	11	127816269	LOC387820 ETS1	G/A	0.098	0.72	39001	0.44	1.032 (0.95 - 1.12)
rs1006737	12	2215556	CACNA1C	G/A	0.323	0.032	21628	0.55	1.024 (0.95 - 1.10)
rs1800693	12	6310270	TNFRSF1A	T/C	0.41	0.19	39250	0.99	1.000 (0.95 - 1.05)
rs4763879	12	9801431	CD69	G/A	0.356	0.49	39233	0.0058	1.077 (1.02 - 1.13)
rs11175593	12	38888207	SLC2A13 LRRK2	C/T	0.025	0.64	38959	0.11	1.146 (0.97 - 1.35)
rs2292239	12	54768447	ERBB3	G/T	0.335	0.64	38959	0.061	1.052 (1.00 - 1.11)
rs2066808	12	55024240	STAT2	A/G	0.067	0.44	39257	0.21	0.936 (0.84 - 1.04)
rs703842	12	56449006	METTL1	A/G	0.315	0.46	39139	0.01	0.931 (0.88 - 0.98)
rs1558744	12	66790859	LOC341333	G/A	0.393	0.19	39256	0.21	0.967 (0.92 - 1.02)
rs3184504	12	110368991	SH2B3	T/C	0.498	0.43	39245	2.6e-12	0.835 (0.79 - 0.88)
rs1385374	12	127866647	SLC15A4	C/T	0.101	0.86	39235	0.34	0.961 (0.88 - 1.04)
rs3764147	13	43355925	C13orf31	A/G	0.245	0.11	39256	0.96	1.002 (0.94 - 1.06)
rs1465788	14	68333352	C14orf181 MAGOH3P	C/T	0.27	0.1	39257	0.97	1.001 (0.95 - 1.06)
rs179247	14	80502299	TSHR	A/G	0.49	0.029	39253	0.53	0.986 (0.94 - 1.04)
rs4900384	14	97568704	LOC100132612 C14orf177	A/G	0.291	0.39	39254	0.9	0.996 (0.94 - 1.05)
rs17574546	15	36689768	RASGRP1 C15orf53	A/C	0.197	0.032	21622	0.96	0.999 (0.92 - 1.09)
rs3825932	15	77022501	CTSH	C/T	0.329	0.72	21628	0.89	1.007 (0.94 - 1.08)
rs11865121	16	11074189	LOC100130276 CLEC16A	C/A	0.347	0.62	21628	0.15	0.954 (0.89 - 1.03)
rs12708716	16	11087374	LOC100130276 CLEC16A	A/G	0.372	0.58	38959	0.00097	0.916 (0.87 - 0.97)
rs4788084	16	28447349	IL27 NUPR1	C/T	0.392	0.39	39254	0.081	1.046 (0.99 - 1.10)
rs7197475	16	30550368	ZNF689 PRR14	C/T	0.363	0.6	39255	0.46	1.019 (0.97 - 1.07)
rs9888739	16	31220754	ITGAM	C/T	0.13	0.023	39198	0.17	1.053 (0.98 - 1.13)
rs1728785	16	67148731	ZFP90	C/A	0.222	0.67	21612	0.72	0.985 (0.91 - 1.07)
rs2872507	17	35294289	ZPBP2 GSDMB	G/A	0.449	0.54	39249	0.69	1.010 (0.96 - 1.06)
rs2290400	17	35319766	GSDMB	T/C	0.489	0.64	39253	0.99	1.000 (0.95 - 1.05)
rs7221109	17	36023812	CCR7 SMARCE1	C/T	0.383	0.11	21626	0.35	1.038 (0.97 - 1.11)
rs744166	17	37767727	STAT3	A/G	0.413	0.24	39256	0.66	1.012 (0.96 - 1.06)
rs2542151	18	12769947	PSMG2 PTPN2	T/G	0.153	0.062	38959	0.49	1.023 (0.95 - 1.10)
rs1893217	18	12799340	PTPN2	A/G	0.154	0.1	39256	0.58	1.018 (0.95 - 1.09)
rs763361	18	65682622	CD226	C/T	0.478	0.71	39223	0.08	1.046 (0.99 - 1.10)
rs425105	19	51900321	PRKD2	T/C	0.158	0.017	39250	0.56	1.021 (0.95 - 1.09)
rs2281808	20	1558551	SIRPG	C/T	0.337	0.51	21617	0.35	0.966 (0.90 - 1.04)
rs6017342	20	42498442	HNF4A LOC100129292	C/A	0.461	0.53	39213	0.33	1.026 (0.98 - 1.08)
rs495337	20	47955737	SPATA2	G/A	0.41	0.32	21627	0.9	0.998 (0.93 - 1.07)
rs2315008	20	61814400	ZGPAT	G/T	0.309	0.092	39254	0.47	0.980 (0.93 - 1.03)
rs1736135	21	15727091	NRIP1 CYCSP42	T/C	0.419	0.24	21628	0.65	0.985 (0.92 - 1.06)
rs2836878	21	39387404	FLJ45139 RPL23AP12	G/A	0.272	0.77	39254	0.79	1.007 (0.95 - 1.06)
rs11203203	21	42709255	UBASH3A	G/A	0.376	0.26	39255	0.93	0.997 (0.95 - 1.05)
rs762421	21	44439989	LOC100129890 ICOSLG	A/G	0.387	0.074	39254	0.32	0.974 (0.93 - 1.03)
rs463426	22	20139185	HIC2 TMEM191C	C/T	0.306	5.2e-13	39235	0.68	0.990 (0.94 - 1.04)
rs5753037	22	28911722	HORMAD2 LIF	C/T	0.38	0.019	39253	0.0026	1.083 (1.03 - 1.14)
rs229541	22	35921264	C1QTNF6 SSTR3	G/A	0.433	0.22	21628	0.0029	1.117 (1.04 - 1.20)
